# Supplementary material for: Neoadjuvant chemotherapy with trastuzumab, docetaxel, and carboplatin administered every 3 weeks for Japanese women with HER2-positive primary breast cancer: efficacy and safety
Source: Springer Nature journal article supplement (doi:10.1007/s10147-017-1136-8), 2017-05-25
Supplement: MOESM1 [file 12315636]

Supplemental Table.

| Parameter  | Luminal/HER2 |       | Non-luminal/HER2 |       | <i>p</i> |
|------------|--------------|-------|------------------|-------|----------|
|            | n            | (%)   | n                | (%)   |          |
| Number     | 25           | (100) | 25               | (100) |          |
| Age, years |              |       |                  |       |          |
| Mean(SD)   | 54.8(±10.0)  |       | 51.6(±9.8)       |       | 0.2      |
| Tumor, mm  |              |       |                  |       |          |
| Mean(SD)   | 39.5(±18.7)  |       | 32.4(±14.6)      |       | 0.1      |
| T-stage    |              |       |                  |       |          |
| 1          | 3            | (12)  | 1                | (4)   | 0.2      |
| 2          | 17           | (68)  | 16               | (64)  |          |
| 3          | 5            | (20)  | 8                | (32)  |          |
| N-stage    |              |       |                  |       |          |
| 0          | 8            | (32)  | 9                | (36)  | 0.9      |
| 1          | 17           | (68)  | 16               | (64)  |          |

SD, standard deviation
